# Supplementary material
Source: Elsevier journal article supplement (https://www.earth-prints.org/bitstream/2122/12755/5/mmc1.docx)
Supplement: mmc1 [file mmc1.docx]

**Supplementary Material for**

**The influence of faulting style on the size-distribution of global earthquakes**

*A. Petruccelli, D. Schorlemmer, T. Tormann, A. P. Rinaldi, S. Wiemer, P. Gasperini, G. Vannucci*

Correspondence: [antonio.petruccelli@sed.ethz.ch](mailto:antonio.petruccelli@sed.ethz.ch)

**Overview**

This file contains Supplementary Figures cited along the main manuscript. See figures captions for a more detailed description.

**Content**

**Fig. S1:** Empirical CDFs for the sum residuals of the Fig. 5B.

**Fig. S2:** *b*-value dependence on rake angle  for different time- selections.

**Fig. S3:** Ternary *b*-value mapping with different number of neighbors.

**Fig. S4:** *b*-depth analysis for Global CMT and ISC-GEM catalogue.


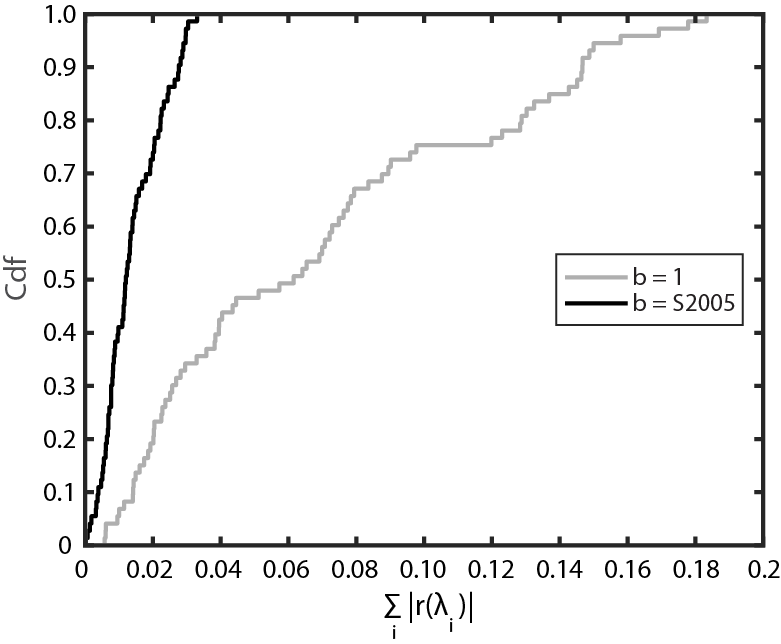


**Figure S1**. Empirical cumulative density functions (Cdf) for the sum residuals of the Fig. 5B (γ=40°) data with respect to a constant b=1 model (grey) and to S2005 (black) data. The two curves are significantly different at 0.01.


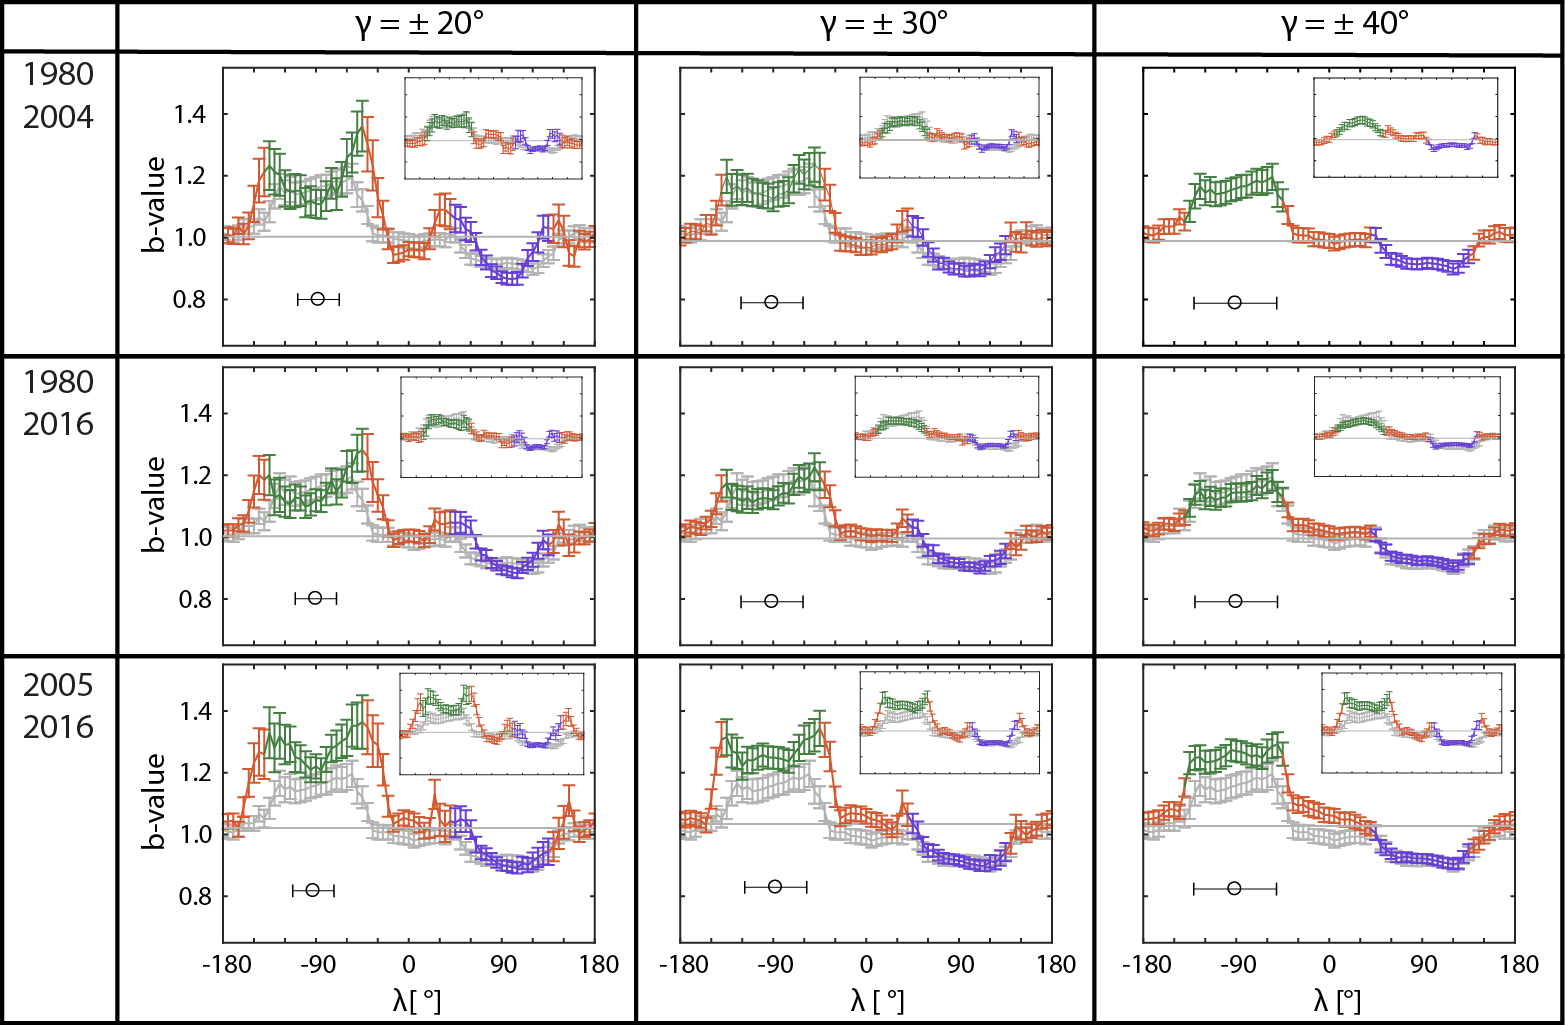


**Figure S2**. Frames of the *b*-value dependence on rake angle  for different time- selections (1980–2016, ±±± common of depth = 0–50 km). Rows show different periods while columns refer to different  value (showed as a horizontal black error bar centred at λ = -90°). Grey *b*-λ dependence from the original(1980–2004, ±) is in the background. Horizontal grey line refers to mean *b*-value for the specific time- subset. Inset upper panels are the analyses for the second nodal plane.

**
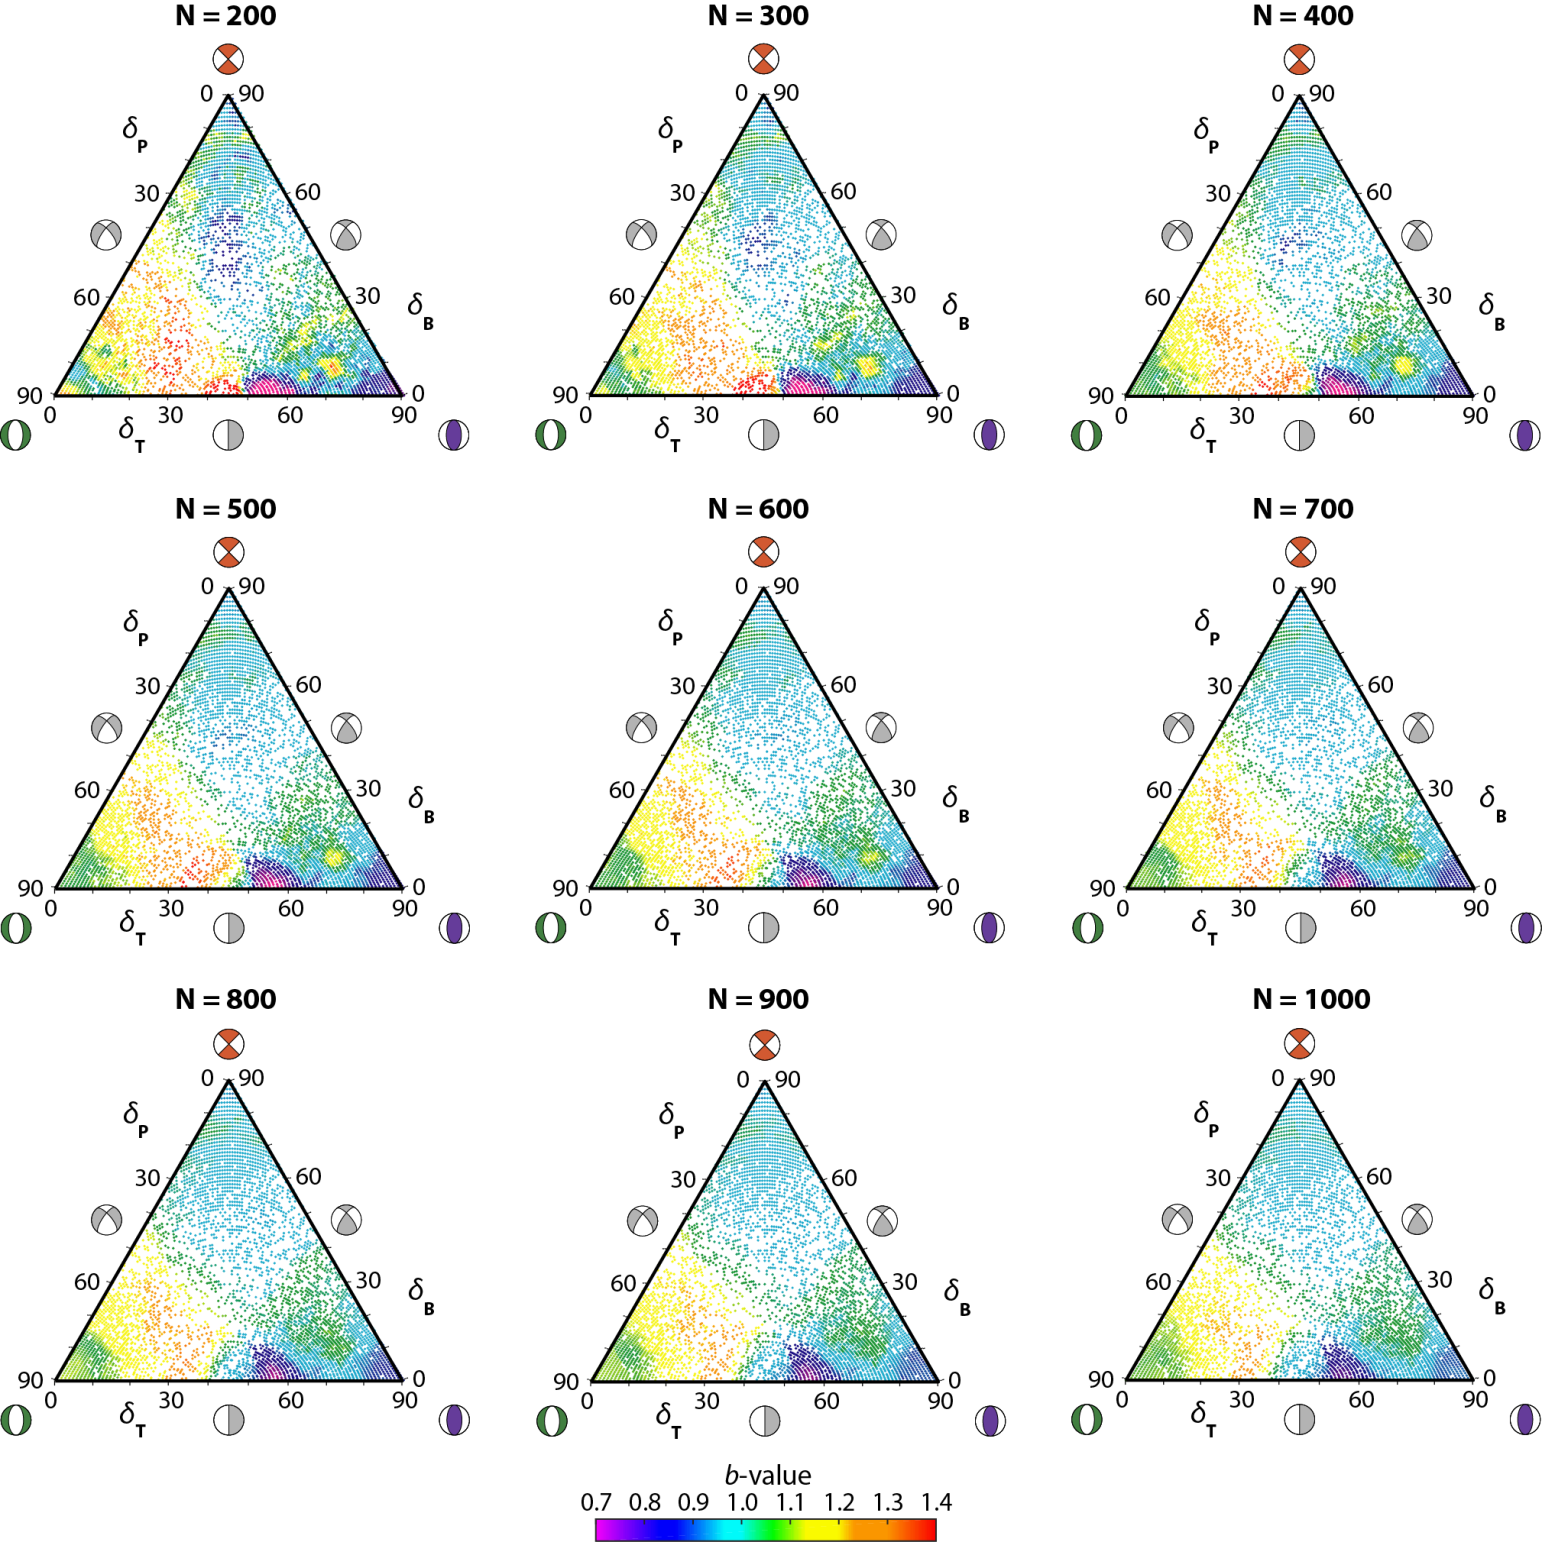
**

Figure S3. Ternary *b*-value mapping with different number of neighbours N (from 200 to 1000).


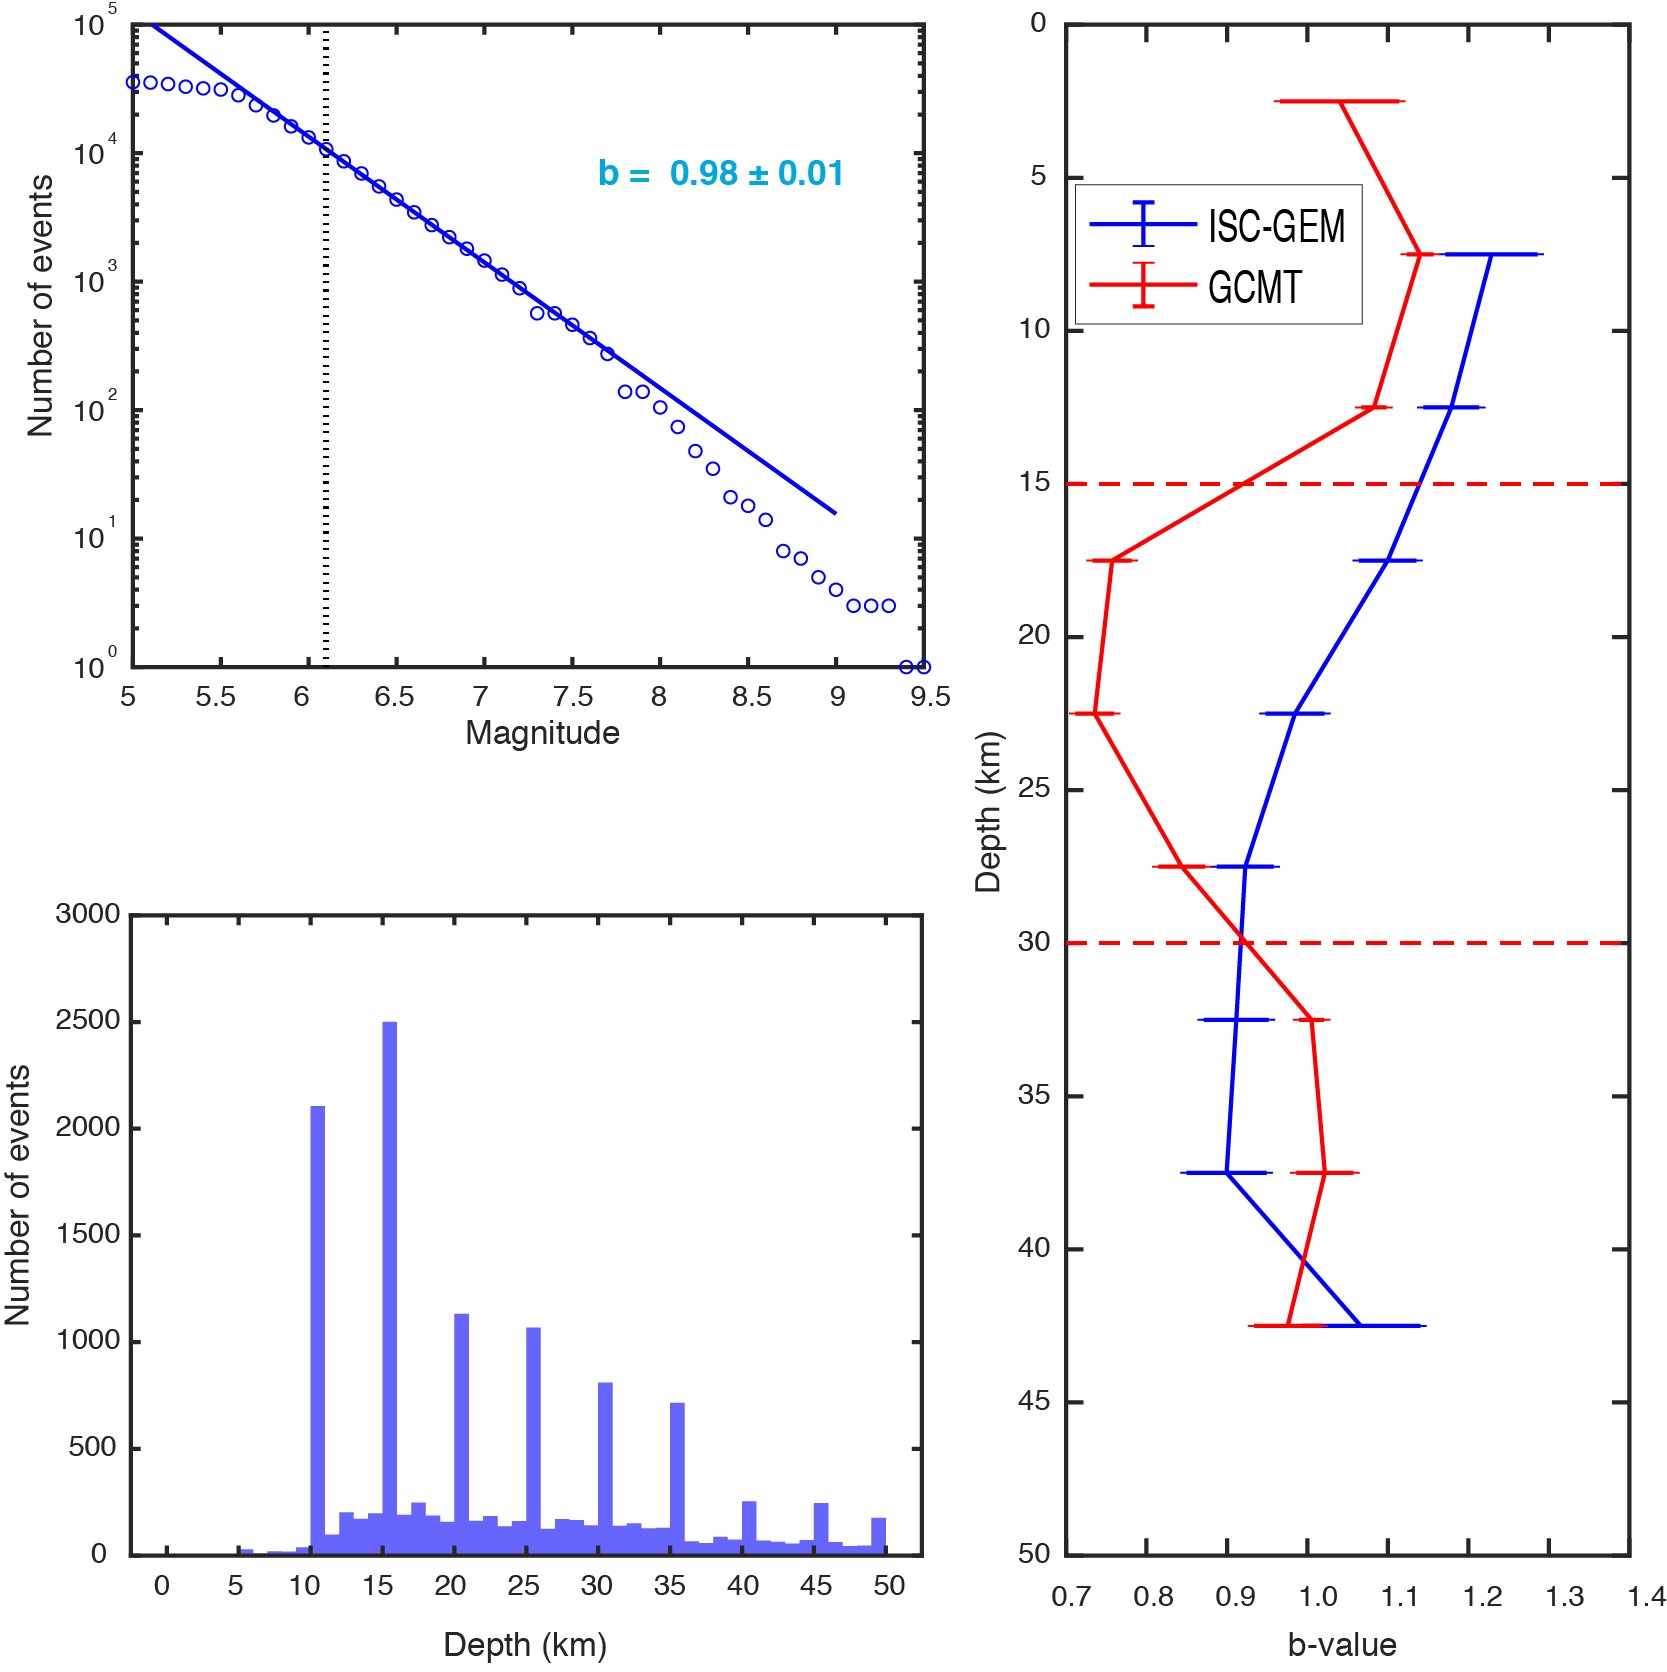


Fig. S4. Jointed *b*-depth analysis for Global CMT (red) and ISC-GEM catalog (blue) (Storchak et al., 2013, 2015; Di Giacomo et al., 2018), data from 1980-2016 in the first 50 km. *Left, top*: frequency-magnitude distribution of ISC-GEM dataset, Mc (6.1) indicated as a dotted vertical line, overall *b*-value (~0.98) indicated with a solid line. *Left, bottom*: depth distribution (sampling bin 1 km). Right: *b*-value – depth sampling (5 km width windows, *b*-values estimated using Equation (1) with a minimum threshold of 50 events) for ISC-GEM and GCMT dataset. Horizontal dashed lines correspond to the chosen depths for the modeling part (see main text).

References

Di Giacomo, D., Engdahl, E.R., Storchak, D.A., 2018. The ISC-GEM Earthquake Catalogue (1904–2014): status after the Extension Project. Earth Syst. Sci. Data 10, 1877–1899. https://doi.org/10.5194/essd-10-1877-2018

Storchak, D.A., Di Giacomo, D., Bondar, I., Engdahl, E.R., Harris, J., Lee, W.H.K., Villasenor, A., Bormann, P., 2013. Public Release of the ISC-GEM Global Instrumental Earthquake Catalogue (1900-2009). Seismol. Res. Lett. 84, 810–815. https://doi.org/10.1785/0220130034

Storchak, D.A., Di Giacomo, D., Engdahl, E.R., Harris, J., Bondár, I., Lee, W.H.K., Bormann, P., Villaseñor, A., 2015. The ISC-GEM Global Instrumental Earthquake Catalogue (1900–2009): Introduction. Phys. Earth Planet. Inter. 239, 48–63. https://doi.org/10.1016/J.PEPI.2014.06.009
